# Supplementary material for: Bird conservation would complement landslide prevention in the Central Andes of Colombia
Source: PeerJ. 2015 Feb 19;3:e779. doi: 10.7717/peerj.779 (PMC4338772; doi:10.7717/peerj.779)
Supplement: Supplemental Information 1 — This table shows the names of the 56 birds used in the analyses, as well as the minimum and maximum elevations used to refine the ranges by elevation. [file peerj-03-779-s001.xlsx]

## Sheet: Central_Andes_birds
Family	Sci_name	Elevation		GLOBAL_IUCN	Col_Endemic
		Min	Max
Trochilidae	Amazilia cyanifrons	400	2000	LC
Tyrannidae	Anairetes agilis	1800	3400	LC
Trochilidae	Anthocephala floriceps	600	2300	VU	1
Emberizidae	Atlapetes blancae	2400	2800	CR	1
Emberizidae	Atlapetes flaviceps	1300	2500	EN	1
Emberizidae	Atlapetes fuscoolivaceus	1600	2400	NT	1
Emberizidae	Atlapetes leucopis	2100	3200	LC
Thraupidae	Bangsia melanochlamys	1000	2300	VU	1
Psittacidae	Bolborhynchus ferrugineifrons	2800	4000	VU	1
Thraupidae	Buthraupis wetmorei	2900	3550	VU
Trochilidae	Campylopterus villaviscensio	1050	1500	NT
Ramphastidae	Capito hypoleucus	400	1600	VU	1
Thamnophilidae	Cercomacra parkeri	1130	1950	LC	1
Formicariidae	Chamaeza turdina	900	2600	LC
Thraupidae	Chlorochrysa nitidissima	900	2200	VU	1
Furnariidae	Cinclodes excelsior	3200	5200	LC
Thamnophilidae	Clytoctantes alixii	185	1750	EN
Cracidae	Crax alberti	0	1200	CR	1
Thraupidae	Diglossa gloriosissima	2500	3800	EN	1
Cotingidae	Doliornis remseni	2875	3650	VU
Trochilidae	Eriocnemis derbyi	2500	3600	NT
Trochilidae	Eriocnemis mosquera	1200	4000	LC
Galbulidae	Galbula pastazae	600	1700	VU
Formicariidae	Grallaria alleni	1800	2500	VU
Formicariidae	Grallaria gigantea	2200	3000	VU
Formicariidae	Grallaria milleri	1800	3150	VU	1
Formicariidae	Grallaria rufocinerea	1950	3150	VU
Formicariidae	Grallaricula cucullata	1500	2700	VU
Cardinalidae	Habia gutturalis	100	1000	NT	1
Psittacidae	Hapalopsittaca amazonina	2000	3000	VU
Psittacidae	Hapalopsittaca fuertesi	2600	3600	CR	1
Troglodytidae	Henicorhina negreti	2250	2640	CR	1
Trochilidae	Hylocharis grayi	500	2000	LC
Icteridae	Hypopyrrhus pyrohypogaster	800	2400	VU	1
Thraupidae	Iridosornis porphyrocephalus	1500	2700	NT
Columbidae	Leptotila conoveri	1600	2500	EN	1
Cotingidae	Lipaugus weberi	1500	1850	EN	1
Furnariidae	Margarornis stellatus	1200	2200	NT
Picidae	Melanerpes pulcher	170	1500	LC	1
Tyrannidae	Myiarchus apicalis	400	2500	LC	1
Parulidae	Myioborus ornatus	2400	3400	LC
Odontophoridae	Odontophorus hyperythrus	1300	2700	NT	1
Psittacidae	Ognorhynchus icterotis	1200	3400	EN
Cracidae	Ortalis columbiana	0	2500	LC	1
Trochilidae	Oxypogon guerinii	3000	5200	LC
Cracidae	Penelope perspicax	650	2200	EN	1
Falconidae	Phalcoboenus carunculatus	3000	4000	LC
Tyrannidae	Phylloscartes lanyoni	450	900	EN	1
Cotingidae	Pipreola lubomirskii	1200	2300	LC
Rhinocryptidae	Scytalopus rodriguezi	2000	2300	EN	1
Rhinocryptidae	Scytalopus stilesi	1420	2130	LC	1
Ramphastidae	Semnornis ramphastinus	1000	2400	NT
Troglodytidae	Thryothorus spadix	400	1800	LC
Trochilidae	Urosticte ruficrissa	1350	2400	LC
Emberizidae	Urothraupis stolzmanni	3000	3600	LC
Pipridae	Xenopipo flavicapilla	1200	2400	NT
